# Supplementary material
Source: Springer Nature journal article supplement (https://www.springermedizin.de/resource/supplementary/12885_2012_4027_MOESM17_ESM.pdf/9465002)

# Live Tissue

# Whole Mount

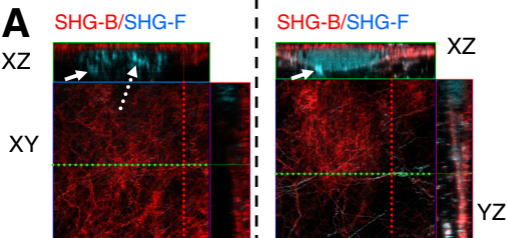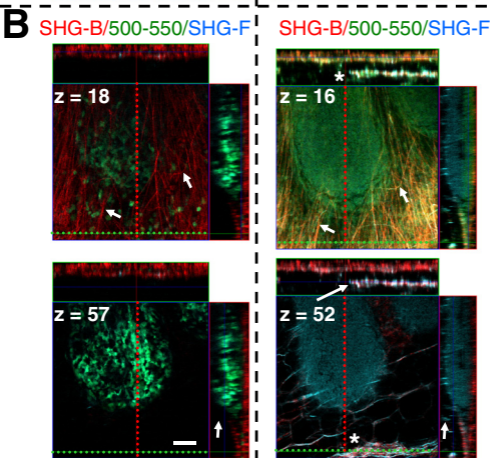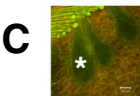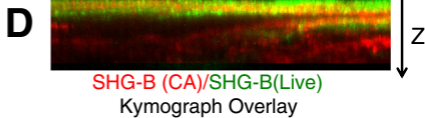

Supplement: MOESM17 [file 9465002]
